# Supplementary material for: Ultrathin ZIF-8 wrapping on Au-dotted Ag-nanowires for highly selective SERS-based CO2 gas detection
Source: Royal Society of Chemistry journal article supplement (doi:10.1039/d0cc07822k), 2021-01-01
Supplement: d0cc07822k1.pdf [file d0cc07822k1.pdf]

**Ultrathin ZIF-8 Wrapping on Au-dotted Ag-Nanowire for SERS-Based CO<sub>2</sub>  
Detection: Portability, Rapidity and High Selectivity**

## **Experimental section:**

### **Materials and reagents**

Silver nitrate ( $\text{AgNO}_3$ , 99.8%), methanol, ethylene glycol (EG, 99.0%), sodium chloride ( $\text{NaCl}$ ), polyvinyl pyrrolidone (K-30), and  $\text{HAuCl}_4 \cdot 4\text{H}_2\text{O}$  were purchased from Shanghai Chemical Co. Ltd. China.  $\text{Zn}(\text{NO}_3)_2 \cdot 6\text{H}_2\text{O}$  and 2-methylimidazole were obtained from Shanghai Aladdin Biochemical Technology Co. Ltd. All reagents were analytical grade without further purification. Ultrapure water was used throughout the experiments.

### **Synthesis of Au NPs**

Gold nanoparticles (Au NPs) were synthesized by a previous reported method<sup>1</sup>. 1 mL  $\text{HAuCl}_4$  aqueous solution was added to 99 mL ultrapure water. Then, 3 mL sodium citrate solution was quickly injected into the boiling  $\text{HAuCl}_4$  solution and further stirring for 30 min. After cooling down, the color of the Au NPs colloid was wine red.

### **Preparation of Ag NWs**

Silver nanowires (Ag NWs) were synthesized by a modified solvothermal polyol process<sup>2</sup>. Polyvinyl pyrrolidone (0.8 g) was dissolved in 20 mL ethylene glycol solution, and then  $\text{AgNO}_3$  (0.6794 g) and  $\text{NaCl}$  (0.7 mg) were also added to another 20 mL ethylene glycol solution. The two solutions were mixed and stirred for 30 min. Finally, the mixture was heated to  $160^\circ\text{C}$  and maintained for 2.5 h. The obtained Ag NWs were collected by centrifugation, repeatedly washed and then dispersed in methanol for further usage.

### **Synthesis of Ag@Au NWs**

10 mL as-synthesis Ag NWs were centrifuged and then added to 85 mL Au NPs colloid. After shaking for 3 h, the products were obtained by centrifugation. Then, the products were repeatedly washed with methanol for further usage.

### **Fabrication of Ag@Au@ZIF-8 NWs**

Zn(NO<sub>3</sub>)<sub>2</sub>·6H<sub>2</sub>O (0.1859 g) and 2-methylimidazole (0.0513 g) was dissolved separately in 25mL methanol. A certain amount of Zn(NO<sub>3</sub>)<sub>2</sub>/methanol solution was added to the as-synthesis Ag@Au NWs. Subsequently, the same amount of 2-methylimidazole/methanol solution was injected into the mixture at 10°C. After 1 minute, the obtained sample was rinsed with methanol. By adjusting the concentration of the ZIF-8 precursor solution and the reaction time during the reaction, ZIF-8 shells with different thicknesses were successfully prepared (70nm, 30nm, 15nm, 5nm and 1nm).

### **Preparation of disordered nanowire membrane**

Ag@Au@ZIF-8 nanowire membrane was made by simple vacuum filtration. And then the obtained membrane was dried at 40°C for further use.

### **SERS Measurement**

First, the obtained membrane was put into a sealed space filled with the mixture gas (N<sub>2</sub>, O<sub>2</sub>, CO<sub>2</sub>) for some time. Subsequently, the SERS detection of the sample was quickly carried out at room temperature.

### **General Characterization Methods.**

Scanning electron microscopy (SEM) images were acquired on a S-4800 SEM instrument (HITACHI, Japan). UV-vis spectra were obtained by using a UV-1800 spectrophotometer (Shimadzu). HRTEM images were performed on a JEM-2100 high-resolution transmission electron microscope. X-ray photoelectron spectroscopy (XPS)(ESCA Lab MK II) was used to detect the chemical composition of the sample. A powder X-ray diffraction (XRD) pattern was obtained using a Philips X'Pert PRO SUPER X-ray diffractometer equipped with graphite-monochromated Cu K $\alpha$  radiation ( $\lambda = 1.54056 \text{ \AA}$ ). The Raman spectra were collected using a Lab RAM HR800 confocal microscope Raman system (Horiba Jobin Yvon, 632.8nm) with a 50 $\times$  objective lens.

The Raman spectra were collected with an acquisition time of 5 s. The gas adsorption and desorption curve are tested on Micromeritics ASAP 2020 M+C at a temperature of 150K.

### **SERS enhancement factor (EF) calculation.**

SERS spectrum was carried out according to the literatures. The EF was calculated as follows:

$$EF = \frac{I_{SERS}}{I_{Raman}} \times \frac{N_{Raman}}{N_{SERS}}$$

Therefore:

$$N_{SERS} = A_{eff}/A_{sum} \times V_{SERS} \times C_1, N_{Raman} = A_{eff} \times H_{eff} \times C_{sol}.$$

$$\begin{aligned} \text{So: } EF &= \frac{I_{SERS}}{I_{Raman}} \times \frac{A_{eff} \times H_{eff} \times C_{sol}}{A_{eff}/A_{sum} \times V_{SERS} \times C_1} \\ &= \frac{I_{SERS}}{I_{Raman}} \times \frac{A_{sum} \times H_{eff} \times C_{sol}}{V_{ads} \times C_1} = \frac{1.32 \times I_{SERS} \times C_{sol}}{I_{Raman} \times C_1} \end{aligned}$$

In the above formula,  $N_{SERS}$  is the number of crystal violet molecules irradiated by laser on the SERS substrate.  $A_{eff}$  is the effective area of the laser spot.  $A_{sum}$  is the area of the SERS substrate (3 mm × 3 mm).  $V_{SERS}$  is the volume of laser irradiation (10 μL).  $C_1$  is the concentration of crystal violet for SERS detection (g/mL).  $N_{Raman}$  is the molecular number of crystal violet in the crystal violet aqueous solution for Raman detection.  $H_{eff}$  is the effective length of the laser irradiation volume (2.2 mm).  $C_{sol}$  is the concentration of the crystal violet solution for non-SERS detection (1.077 g/mL). The peak value of SERS is 5017 (Fig. S6B) and the peak value of Raman is 1283 (Fig. S6A). The increase intensity factor of SERS substrate to  $5 \times 10^{-6}$  M crystal violet is  $2.73 \times 10^6$  by the above formula.

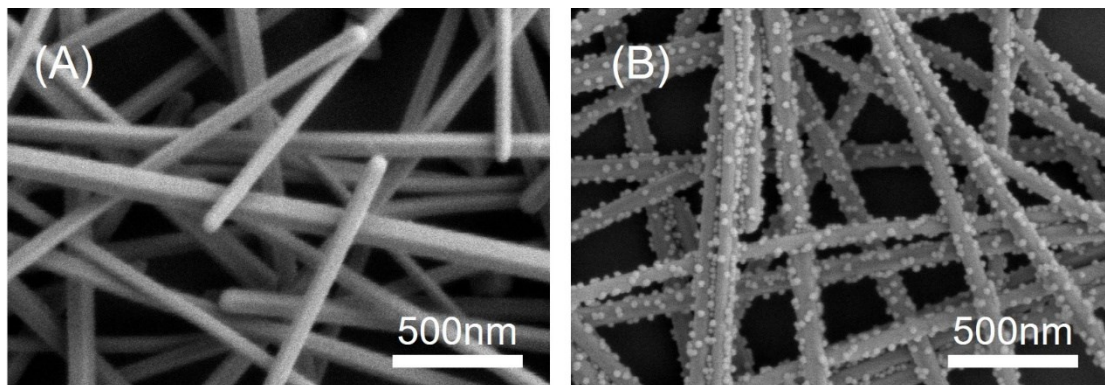

**Fig. S1** (A) SEM images of the as-synthesized Ag nanowires. (B) SEM images of the Ag@Au nanowires.

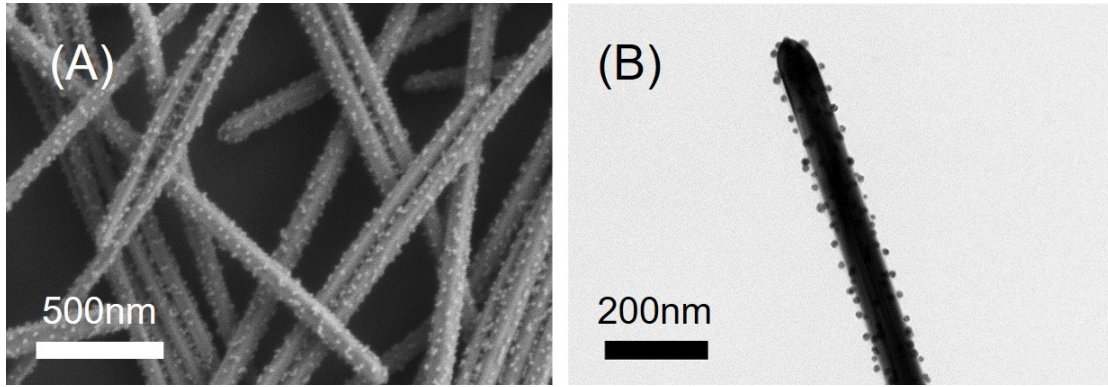

**Fig. S2** (A) SEM images of the Ag@Au@ZIF-8 core/shell structure nanowires. (B) SEM images of Ag@Au@ZIF-8 core/shell structure nanowires.

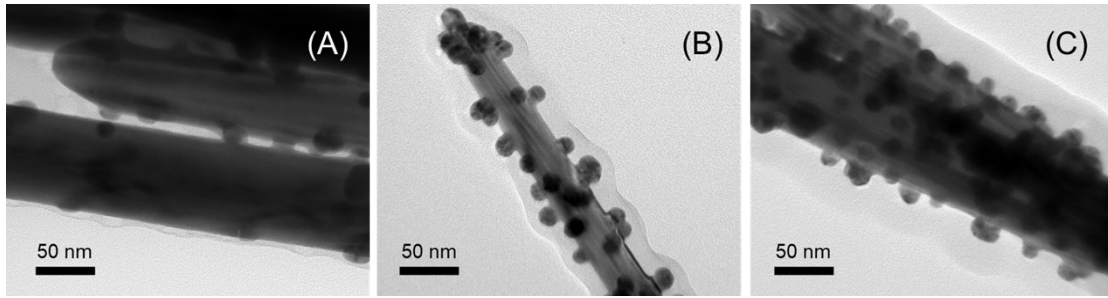

**Fig. S3** (A) (B) (C) TEM images of the Ag@Au@ZIF-8 core/shell structure nanowires with different thicknesses of ZIF-8 shells (5nm, 15nm and 30nm).

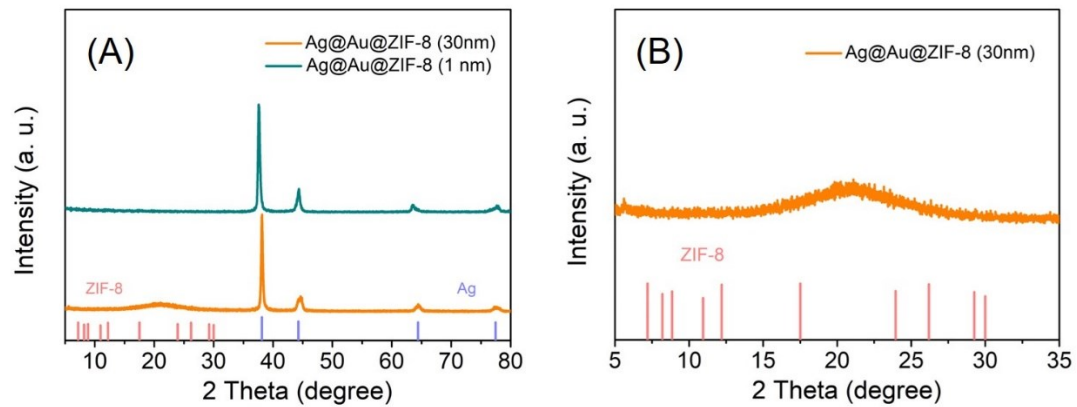

**Fig. S4** (A) XRD patterns of Ag@Au@ZIF-8 nanowires. (B) Enlarged details of 5-35 degree.



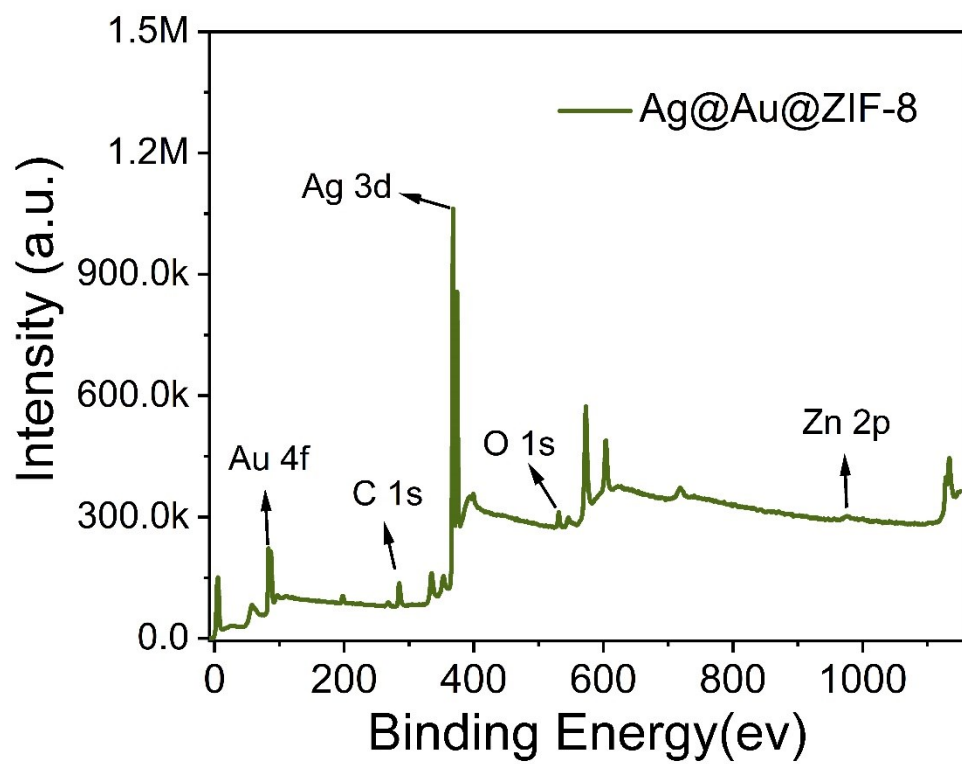

**Fig. S5** XPS full-scale spectrum of Ag@Au@ZIF-8 nanowires.

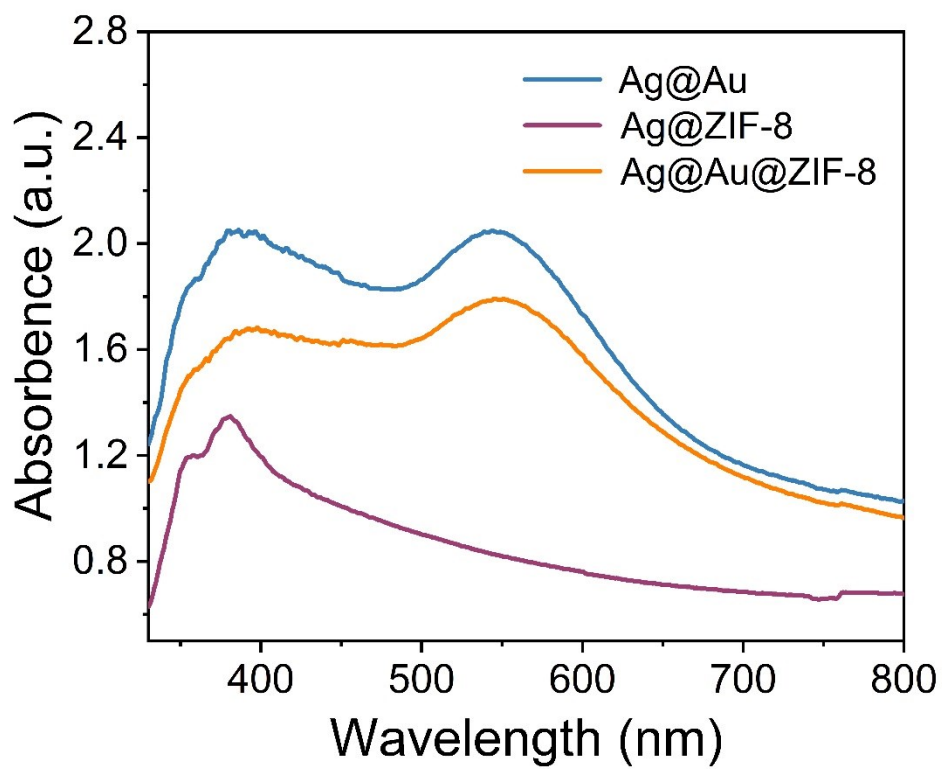

**Fig. S6** UV-vis spectra of the Ag@Au nanowires, Ag@ZIF-8 nanowires and Ag@Au@ZIF-8 nanowires.

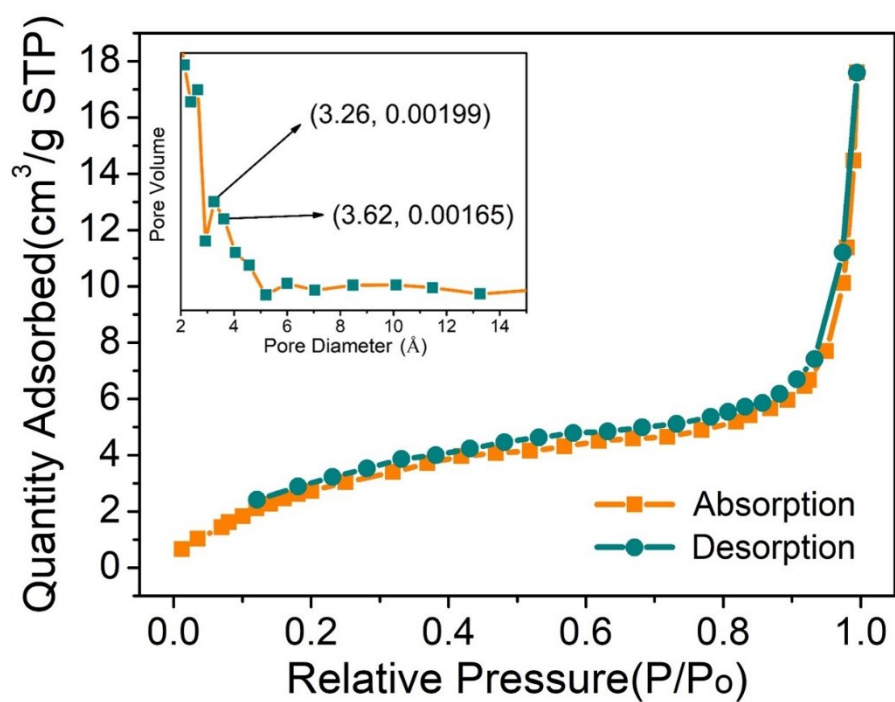

**Fig. S7** Nitrogen adsorption-desorption isotherms and Insets: Pore-size distribution of the as-prepared typical Ag@Au@ZIF-8 NWs (1 nm).

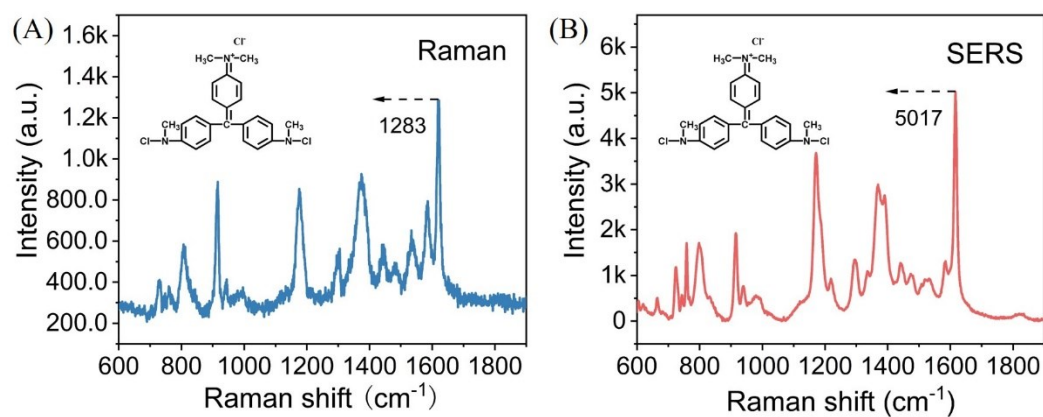

**Fig. S8** (A) Raman spectrum of CV. (B) SERS spectrum of CV obtained on Ag@Au@ZIF-8 NWs/TF.

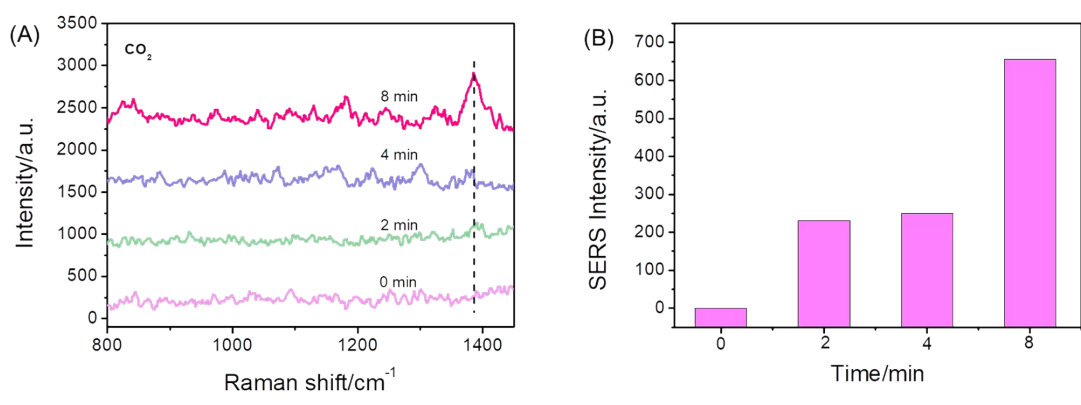

**Fig. S9** (A) SERS spectrum of CO<sub>2</sub> gas obtained on Ag@Au@ZIF-8 NWs/TF after different time. (B) Intensity of SERS spectrum at 1395 cm<sup>-1</sup> after different time.

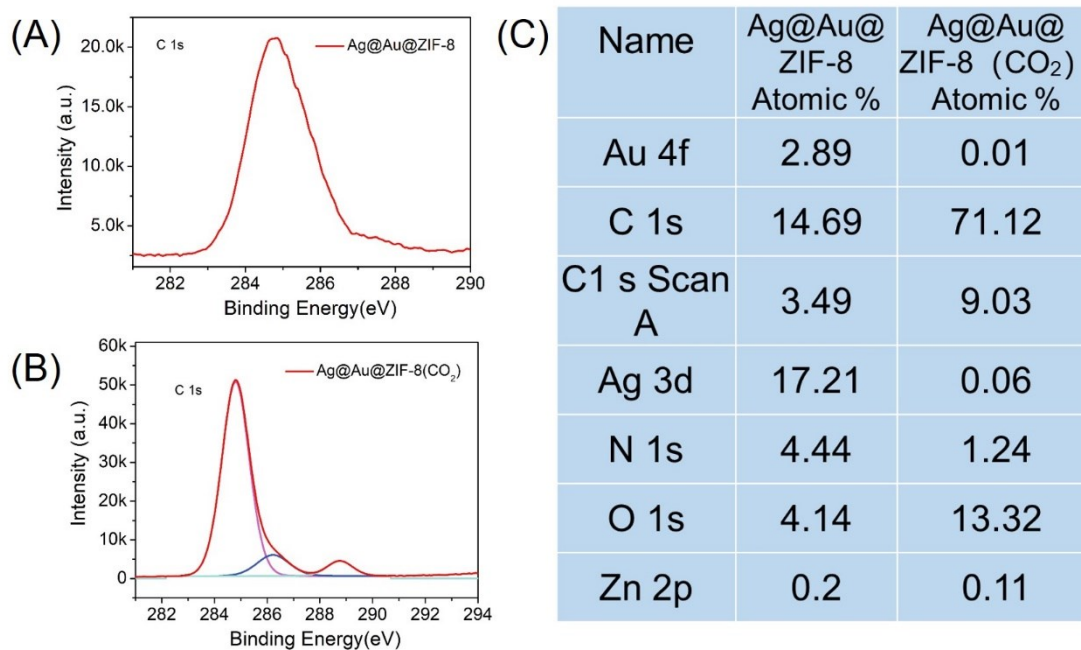

**Fig. S10** (A) the high-resolution XPS spectra of C of Ag@Au@ZIF-8. (B) the high-resolution XPS spectra of C of Ag@Au@ZIF-8(CO<sub>2</sub>). (C) Comparison table of component content of Ag@Au@ZIF-8 before and after absorption of CO<sub>2</sub> according to XPS survey spectra of the Ag@Au@ZIF-8 and Ag@Au@ZIF-8(CO<sub>2</sub>).

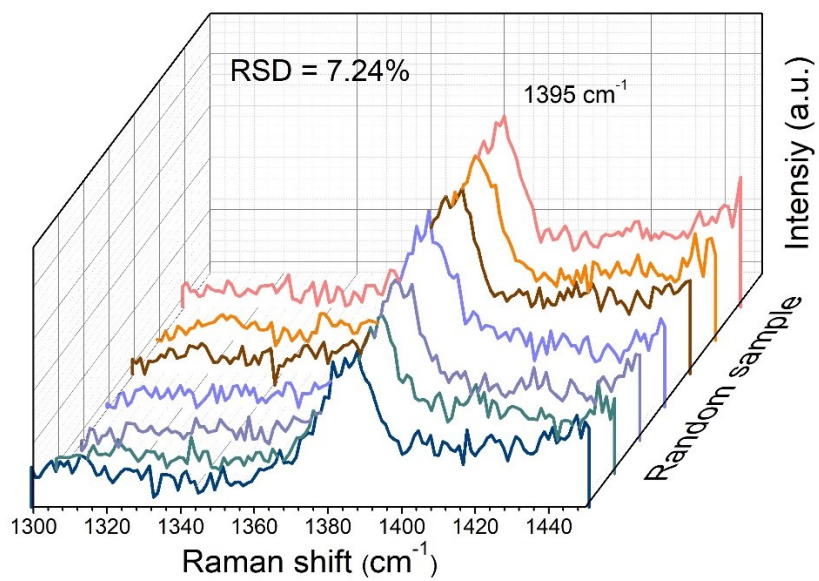

**Fig. S11** SERS spectra of CO<sub>2</sub> collected from random sample.

**Table S1 The atomic percentages of Ag@Au@ZIF-8 nanowires from XPS**

| Name        | Atomic % |
|-------------|----------|
| Au 4f       | 2.89     |
| C 1s        | 14.69    |
| Cl s Scan A | 3.49     |
| Ag 3d       | 17.21    |
| N 1s        | 4.44     |
| O 1s        | 4.14     |
| Zn 2p       | 0.2      |



## Notes and references

1. S. S. R. Dasary, A. K. Singh, D. Senapati, H. Yu and P. C. Ray, *Journal of the American Chemical Society*, 2009, **131**, 13806-13812.
2. Y. Sun, Y. Yin, B. T. Mayers, T. Herricks and Y. Xia, *Chemistry of Materials*, 2002, **14**, 4736-4745.
